# Supplementary material
Source: PubMed Central journal article supplement (PMC6855250)
Supplement: NIHMS1534160-supplement-1.pdf [file NIHMS1534160-supplement-1.pdf]

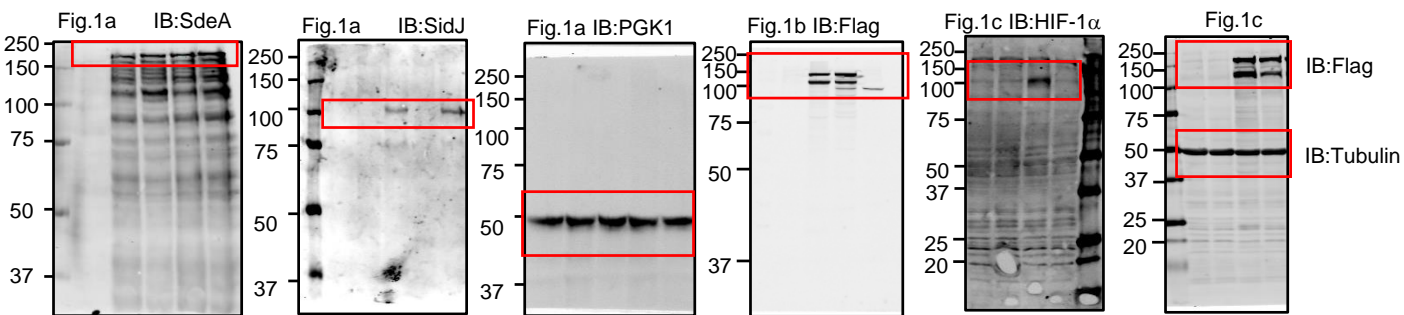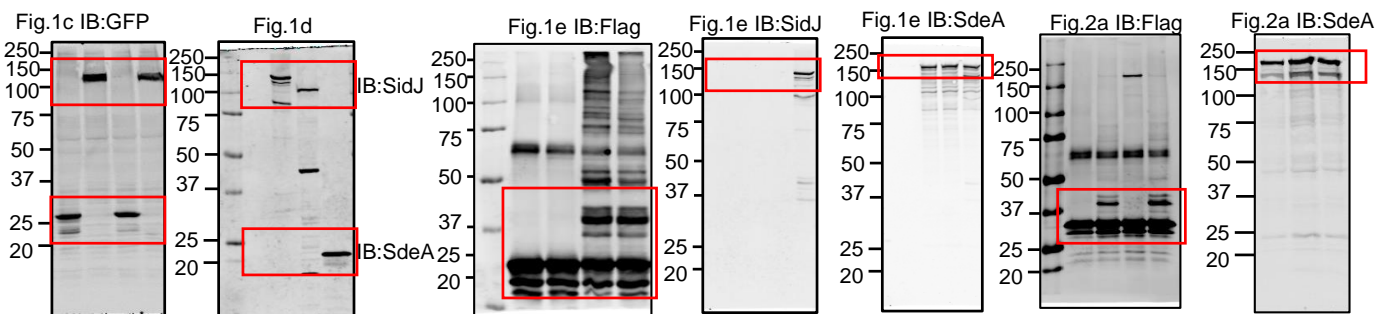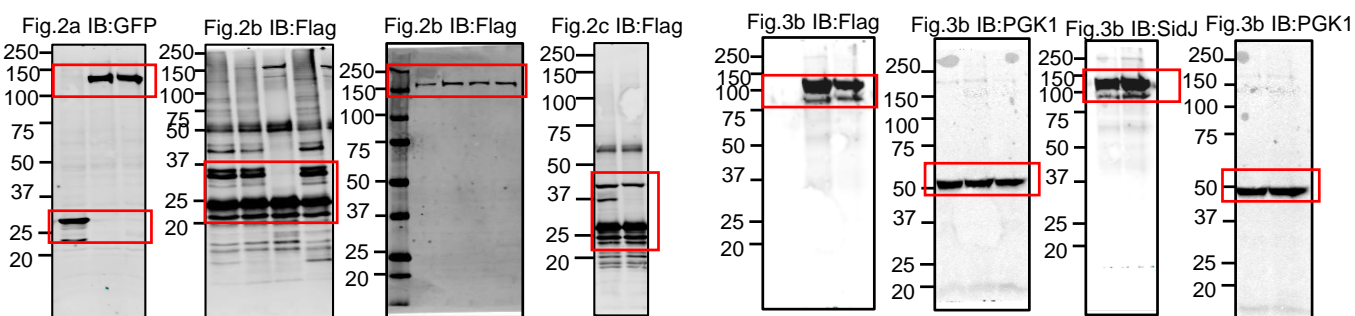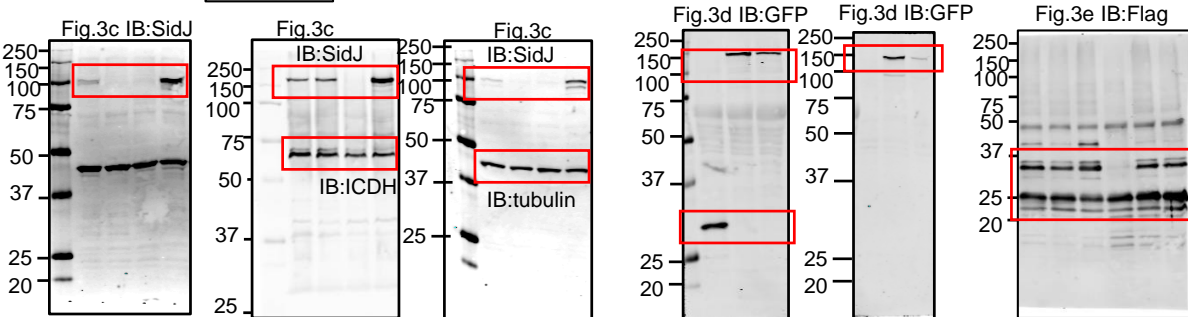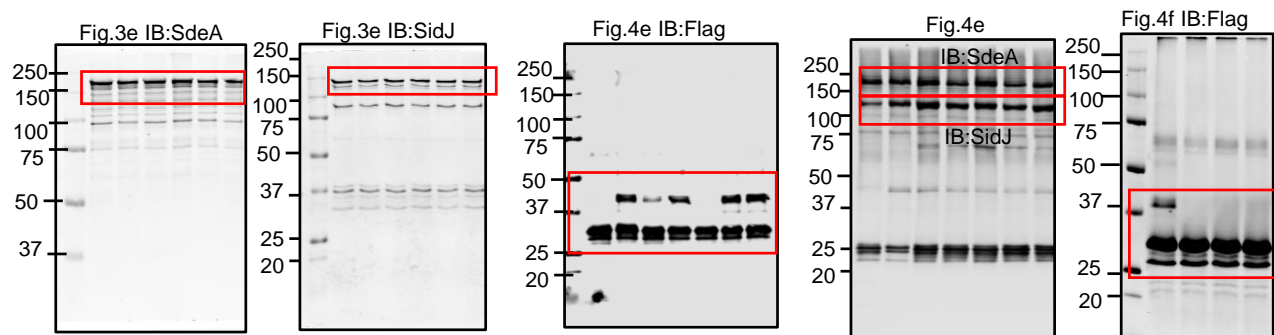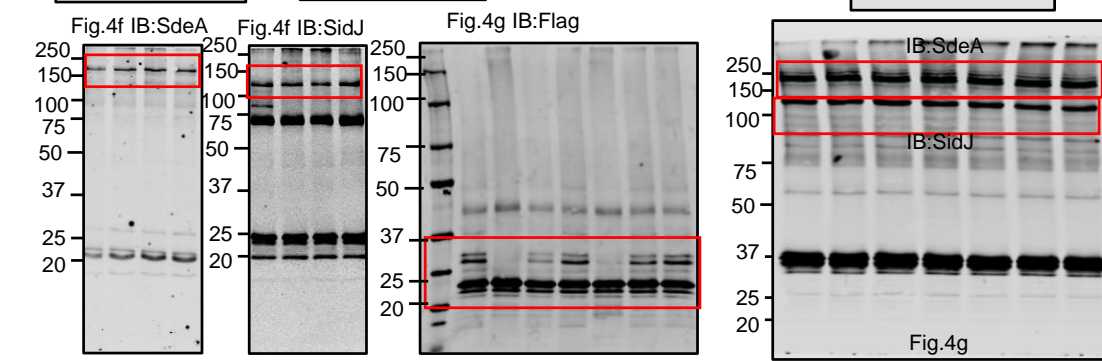

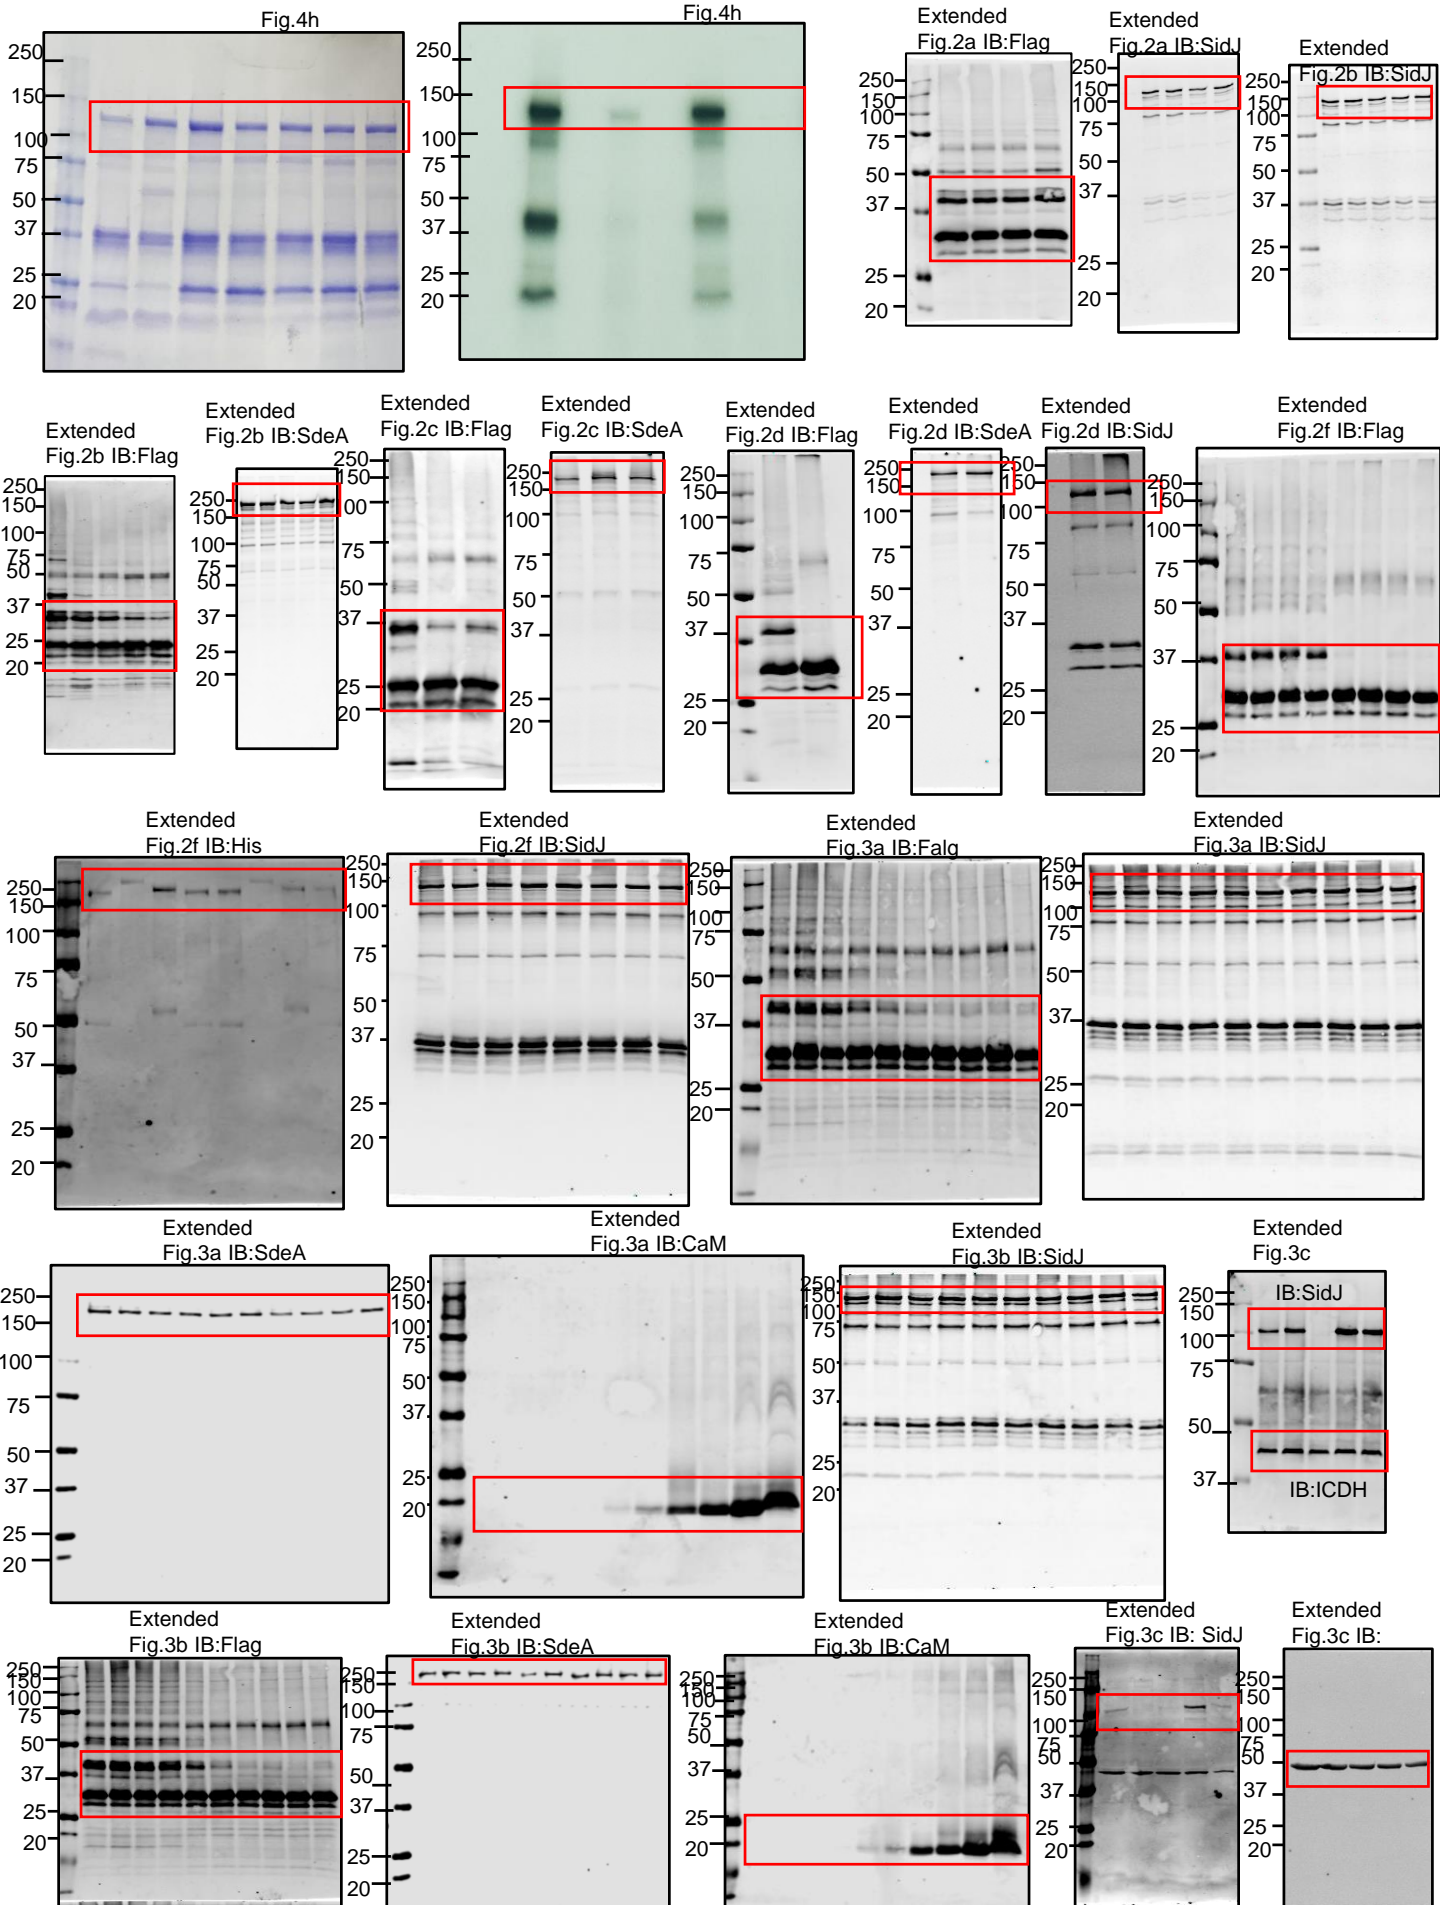

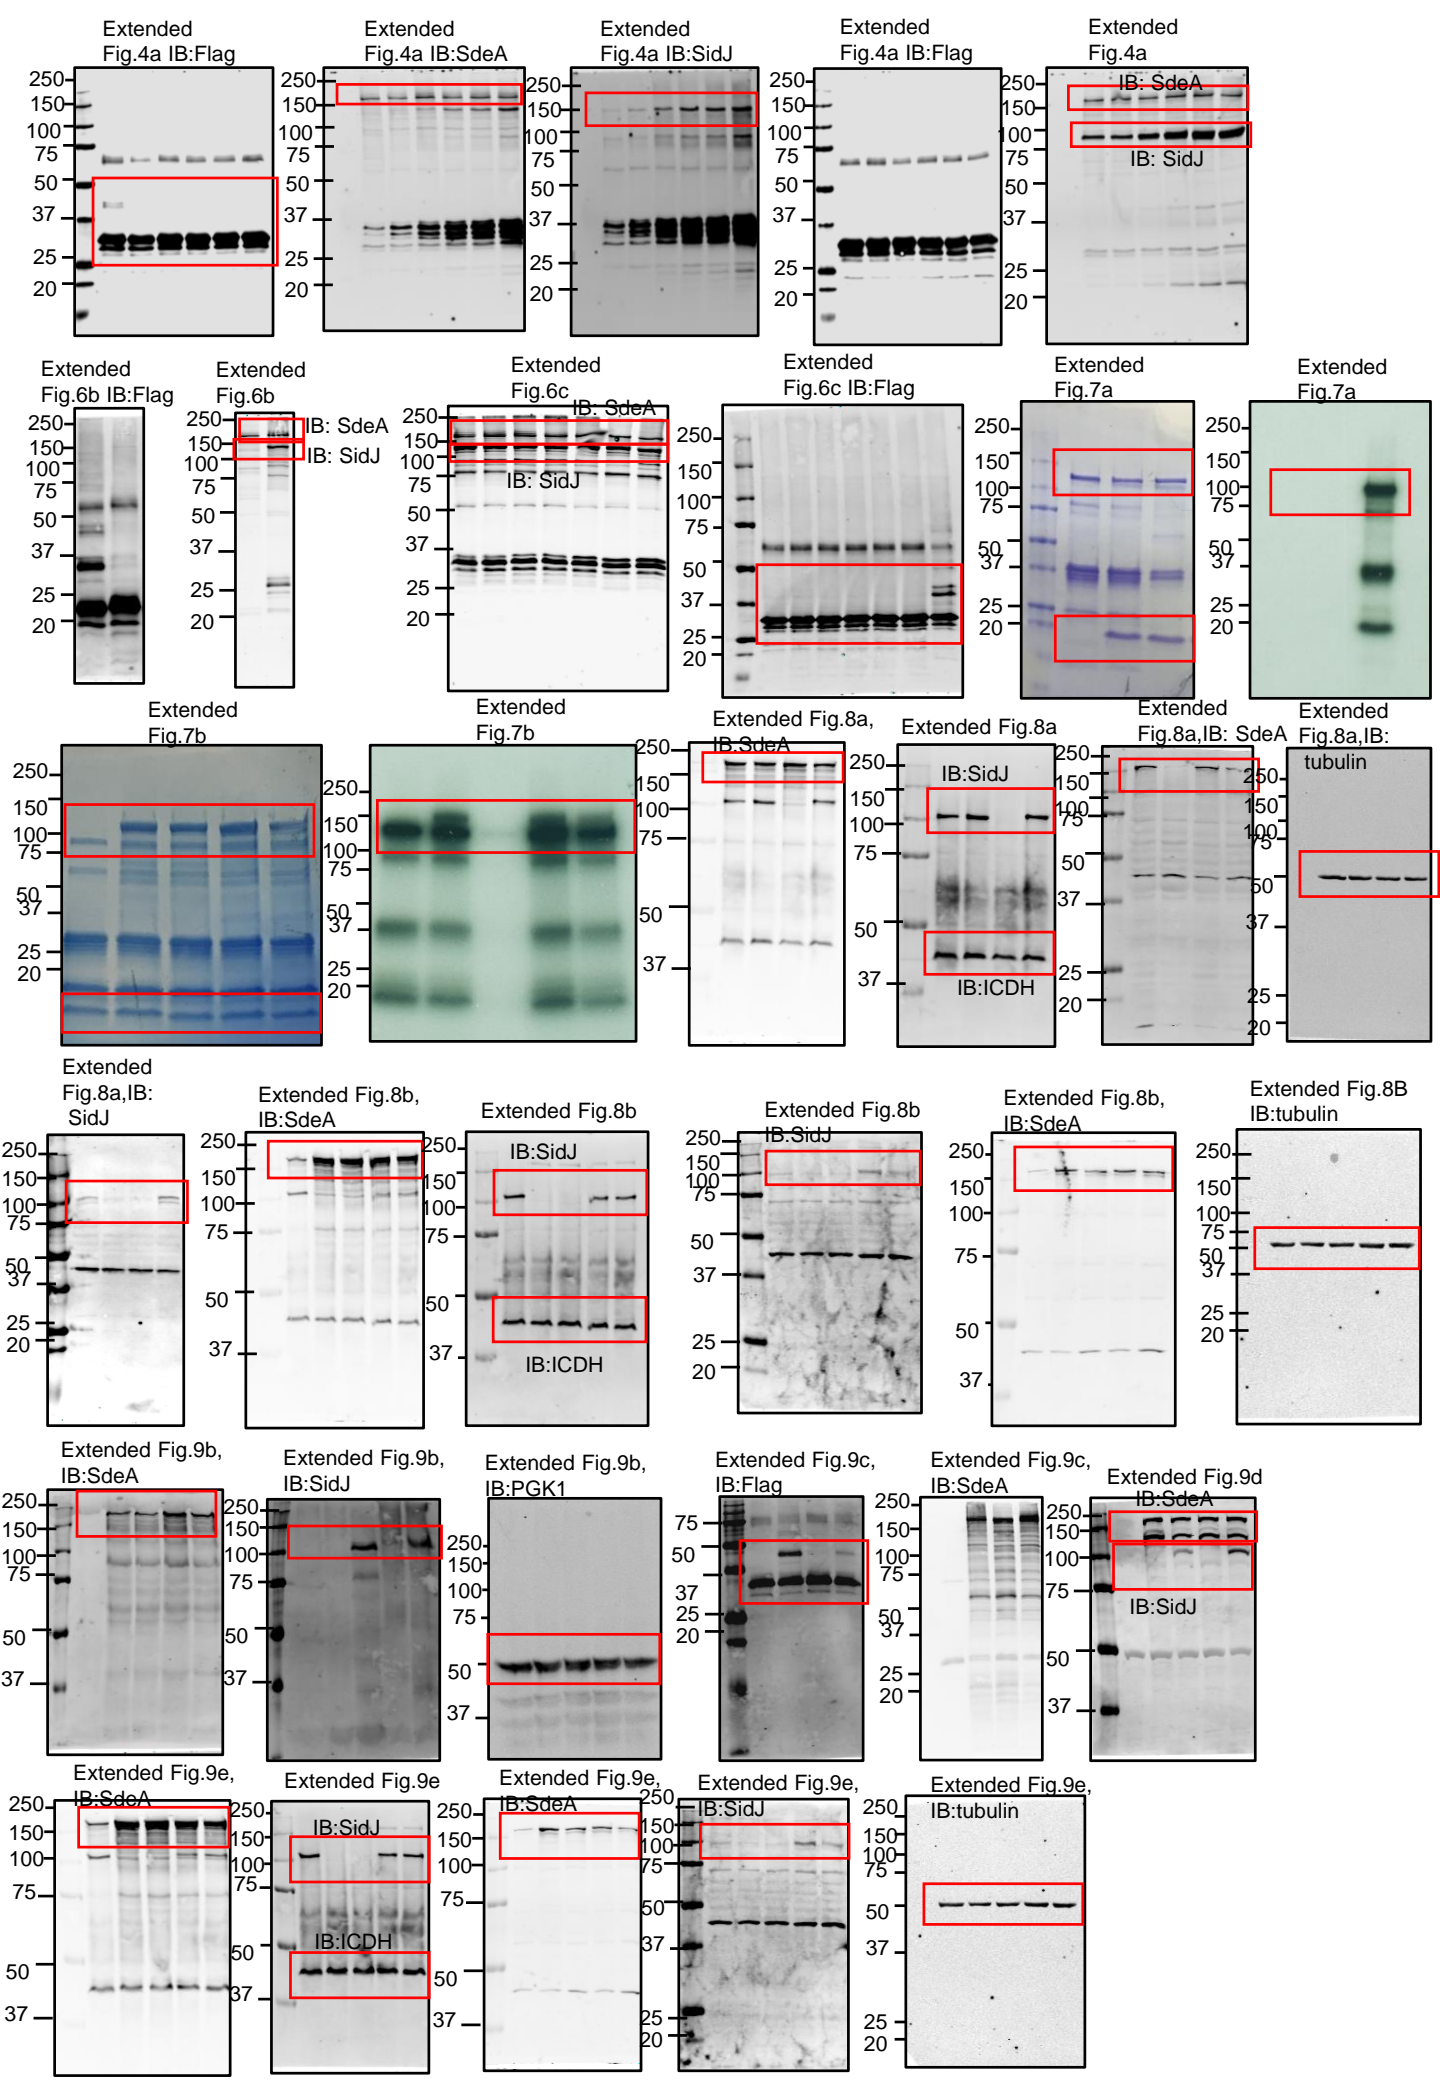

**Note:**

Fig 1b lower panel,

Fig 1d upper panel,

Fig 2d,

Fig 3f,

Extended Fig 4b,

Extended Fig 9a,

Extended Fig 9d lowest panel,

are already shown as uncropped images
